# Supplementary material for: How seasonal hydroclimate variability drives the triple oxygen and hydrogen isotope composition of small lake systems in semiarid environments
Source: Copernicus journal article supplement (doi:10.5194/hess-2024-290), 2024-10-09
Supplement: Supplementary file 1 [file hess-2024-290-supplement.zip]

## Sheet: Table S1
	Table S1: Hydrochemical composition of sampled natural waters at Laguna Honda. TDS = total dissolved solids, calculated as the sum of measured cation and anion concentrations; bdl = below detection limit.
	Sample ID	Sampling Date	Water level (m)	Precipitation amount (mm)	Na+ (g L-1)	K+ (g L-1)	NH4+ (g L-1)	Mg2+ (g L-1)	Ca2+ (g L-1)	Cl- (g L-1)	F- (g L-1)	Br- (g L-1)	NO3- (g L-1)	SO42- (g L-1)	TDS (g L-1)
	Lake water, southern margin
	AH-7	2021-01-28	1.30733	–	4.18998	0.061605	0.000631	3.10635	0.429882	9.47978	0.00225	0.020539	0.046614	5.66742	23.005
	AH-9	2021-02-23	1.495	–	3.69758	0.054687	0.000449	2.73951	0.39277	8.65273	0.001479	0.028162	0.040157	9.34345	24.951
	AH-11	2021-03-18	1.34417	–	4.19874	0.062895	0.002051	3.12194	0.448913	9.47414	0.001745	0.024044	0.044595	6.04536	23.4244
	AH-12	2021-04-20	1.25033	–	5.5419	0.078948	0.000633	4.08399	0.551222	12.2582	0.003074	0.039004	0.058673	12.9089	35.5246
	AH-14	2021-05-06	1.25333	–	6.00518	0.083076	bdl	4.41515	0.548553	11.3487	0.002546	0.039332	0.066616	11.9996	34.5087
	AH-16	2021-05-26	1.16833	–	7.00168	0.098541	0.000874	5.18201	0.634377	15.7566	0.003254	0.053347	0.077802	16.6015	45.41
	AH-18	2021-06-14	1.096	–	9.38562	0.146842	0.001285	6.99052	0.818647	20.2183	0.008776	0.06698	0.10678	20.2019	57.9457
	AH-20	2021-07-13	0.923167	–	12.8471	0.190464	0.001995	9.59961	1.15432	28.1056	0.003995	0.085265	0.108078	30.1046	82.201
	AH-22	2021-07-27	0.801333	–	12.4739	0.166028	0.001296	9.31144	0.847791	28.0543	0.016226	0.087491	0.163003	29.7571	80.8787
	AH-23	2021-09-08	0.6325	–	18.4637	0.253138	bdl	13.9995	0.764835	37.9297	0.010377	0.113093	0.138594	39.3444	111.017
	AH-24	2021-10-06	0.639	–	20.8268	0.299778	0.004823	11.4138	0.546437	43.3084	0.006893	0.130898	0.148973	45.8422	122.529
	AH-25	2021-11-04	0.572667	–	20.343	0.28613	bdl	15.6656	0.565053	45.1103	0.003612	0.129709	bdl	47.3967	129.5
	AH-26	2021-12-03	0.628167	–	14.0109	0.172682	bdl	11.033	0.42087	30.5038	0.004608	0.08804	0.104923	32.9857	89.3245
	AH-27	2022-01-11	0.712167		17.4838	0.256814	bdl	11.0858	0.553997	38.834	0.005027	0.090203	0.102283	40.2963	108.708
	Lake water, northern margin			–
	AH-8	2021-02-02	1.28633	–	4.3232	0.064016	0.000572	3.2257	0.444014	10.7163	0.006174	0.022478	0.120896	6.47125	25.3946
	AH-10	2021-02-23	1.495	–	3.76944	0.057406	0.000512	2.81799	0.406208	8.79408	0.001586	0.028509	0.040228	9.48966	25.4056
	AH-13	2021-04-20	1.25033	–	5.54134	0.076466	0.000645	4.09373	0.548496	12.2281	0.003043	0.038695	0.057484	12.9211	35.5091
	AH-15	2021-05-06	1.25333	–	5.69331	0.074631	bdl	4.18936	0.523786	13.206	0.002399	0.045513	0.0666	14.1021	37.9037
	AH-17	2021-05-26	1.16833	–	7.29401	0.112502	0.000874	5.3769	0.729509	16.2867	0.015065	0.052385	0.084572	17.2135	47.166
	AH-19	2021-06-14	1.096	–	10.8543	0.161144	0.001305	7.95765	1.02508	23.1228	bdl	0.07909	0.106469	24.0423	67.3502
	AH-21	2021-07-13	0.923167	–	18.4413	0.27056	0.002565	13.6364	0.730744	39.9922	0.013483	0.1288	0.17704	40.325	113.718
	Precipitation
		2021-01-28	–	73.8	bdl	bdl	bdl	bdl	bdl	0.00371	bdl	bdl	0.001532	bdl	0.005242
		2021-02-23	–	61	0.001098	0.000607	bdl	0.001946	0.017926	0.00463	5.6e-05	bdl	0.001333	0.002854	0.03045
		2021-03-18	–	14.8	0.001821	0.000981	bdl	0.003465	0.02511	0.002651	0.000109	bdl	0.002585	0.006464	0.043186
		2021-04-20	–	28.2	0.00157	0.001354	bdl	0.002754	0.027282	0.003463	6.8e-05	bdl	bdl	0.010143	0.046634
		2021-05-16	–	39.8	0.000918	0.000793	bdl	0.001823	0.02545	0.002827	7e-05	bdl	bdl	0.005475	0.037356
		2021-05-26	–	1.6	0.001821	0.001484	bdl	0.002182	0.030162	0.004417	6.8e-05	0.000442	0.001378	0.007027	0.048981
		2021-06-14	–	39	0.001745	0.003093	bdl	0.00323	0.033635	0.003121	7.6e-05	bdl	bdl	bdl	0.0449
		2021-11-04	–	56.8	bdl	bdl	bdl	bdl	bdl	0.014713	7.8e-05	0.015924	bdl	0.072831	0.103546
		2021-12-03	–	31.2	bdl	bdl	bdl	bdl	bdl	bdl	bdl	bdl	bdl	bdl	bdl
		2022-01-11	–	67.6	bdl	bdl	bdl	bdl	bdl	0.00376	bdl	0.001086	bdl	0.011355	0.016201

## Sheet: Table S2
	Table S2: Saturation indices for lake water samples calculated for calcite, aragonite, dolomite, gypsum, anhydrite and halite using the Aquachem software.If the saturation index is >0, mineral precipitation will occur (orange) and if it is <0, mineral dissolution will take place (blue).
	Sample ID	Sampling Date	Water level (m)	Calcite	Aragonite	Dolomite	Gypsum	Anhydrite	Halite
	Lake water, southern margin
	AH-7	2021-01-28	1.30733	1.3973	1.2471	3.9232	-0.3239	-0.561	-3.2014
	AH-9	2021-02-23	1.495	1.3401	1.1878	3.7465	-0.1284	-0.3713	-3.2921
	AH-11	2021-03-18	1.34417	1.6031	1.4533	4.3239	-0.2854	-0.5215	-3.2025
	AH-12	2021-04-20	1.25033	1.5982	1.4497	4.3603	0.0104	-0.2182	-2.9882
	AH-14	2021-05-06	1.25333	1.3921	1.2489	4.0618	-0.0717	-0.2762	-3.0049
	AH-16	2021-05-26	1.16833	1.3814	1.2359	4.0192	0.0871	-0.1253	-2.7901
	AH-18	2021-06-14	1.096	1.2329	1.0943	3.8286	0.1564	-0.0085	-2.5731
	AH-20	2021-07-13	0.923167	1.5868	1.4453	4.5031	0.4118	0.236	-2.2591
	AH-22	2021-07-27	0.801333	1.4783	1.335	4.3847	0.2948	0.1079	-2.2684
	AH-23	2021-09-08	0.6325	1.4645	1.3191	4.5708	0.3082	0.1241	-1.9049
	AH-24	2021-10-06	0.639	1.4111	1.2613	4.446	0.2993	0.1024	-1.7722
	AH-25	2021-11-04	0.572667	1.5531	1.4012	4.8307	0.3024	0.1036	-1.7297
	AH-26	2021-12-03	0.628167	1.5006	1.3449	4.6164	0.108	-0.1138	-2.1183
	AH-27	2022-01-11	0.712167	1.601	1.4475	4.7445	0.2866	0.0753	-1.9009
	Lake water, northern margin
	AH-8	2021-02-02	1.28633	1.4809	1.3307	4.0939	-0.2715	-0.5077	-3.1376
	AH-10	2021-02-23	1.495	1.3055	1.1522	3.656	-0.1065	-0.3509	-3.2739
	AH-13	2021-04-20	1.25033	1.3645	1.2155	3.8879	0.0133	-0.2169	-2.9877
	AH-15	2021-05-06	1.25333	1.0316	0.8918	3.3653	-0.0365	-0.2204	-2.9766
	AH-17	2021-05-26	1.16833	0.9408	0.7972	3.1163	0.1403	-0.0615	-2.7647
	AH-19	2021-06-14	1.096	0.1799	0.0434	1.6988	0.2791	0.1351	-2.4532
	AH-21	2021-07-13	0.923167	1.3338	1.1951	4.3888	0.2547	0.1132	-1.9099

## Sheet: Table S3
	Table S3: Hydrogen and oxygen isotope composition of natural waters at Laguna Honda.
	Sample ID	Sampling Date	Water level (m)	Precipitation amount (mm)	δ17O (‰)		δ18O (‰)		δ2H (‰)		17O-excess (per meg)
					AV	SD	AV	SD	AV	SD	AV	SD	SE
	Southern lake margin
	AH-7	2021-01-28	1.30733	–	-1.04065	0.0368168	-1.94746	0.0452027	-26.233	0.18648	-11.9363	22.312	8.43316
	AH-9	2021-02-23	1.495	–	-0.27283	0.0424135	-0.500267	0.0691169	-15.3365	0.124044	-8.65925	25.1848	9.51896
	AH-11	2021-03-18	1.34417	–	0.653362	0.0478195	1.25895	0.0875802	-6.96414	0.398577	-11.1605	20.719	9.26582
	AH-12	2021-04-20	1.25033	–	1.98487	0.0339797	3.8151	0.0706723	4.68878	0.422889	-27.6387	10.6066	4.00893
	AH-14	2021-05-06	1.25333	–	2.57761	0.0553859	4.97679	0.107779	10.8277	1.04075	-46.9304	16.2506	6.63428
	AH-16	2021-05-26	1.16833	–	3.7496	0.0613604	7.18171	0.103487	19.6906	0.382611	-35.8072	19.968	8.15191
	AH-18	2021-06-14	1.096	–	4.64297	0.0375918	8.88527	0.0792074	27.8804	0.227999	-38.4769	21.4893	8.12219
	AH-20	2021-07-13	0.923167	–	6.14922	0.0441799	11.7629	0.0606281	39.5495	0.213923	-44.1534	24.1751	9.86946
	AH-22	2021-07-27	0.801333	–	6.72301	0.0700621	12.8911	0.165468	43.7663	0.436249	-62.4983	24.3743	10.9005
	AH-23	2021-09-08	0.6325	–	7.77117	0.111286	14.9142	0.196476	50.6862	0.5163	-75.4151	10.5363	4.30144
	AH-24	2021-10-06	0.639	–	7.34218	0.122698	14.0932	0.240209	47.4907	0.628266	-73.8732	18.1808	7.42226
	AH-25	2021-11-04	0.572667	–	5.60488	0.0375948	10.7706	0.0655238	34.3698	0.194551	-67.2175	20.681	8.44297
	AH-26	2021-12-03	0.628167	–	5.16566	0.0308244	9.97239	0.0532411	31.2739	0.331276	-86.9763	22.5135	8.50929
	AH-27	2022-01-11	0.712167		4.33472	0.0399655	8.34598	0.0689116	24.1054	0.1631	-63.0396	20.1241	7.60618
	Northern lake margin			–
	AH-8	2021-02-02	1.28633	–	-0.812582	0.0400071	-1.49082	0.076193	-23.6298	0.445882	-25.1722	8.01126	3.27058
	AH-10	2021-02-23	1.495	–	-0.299391	0.0639169	-0.542345	0.0998352	-15.1003	0.19226	-12.9989	16.4929	6.7332
	AH-13	2021-04-20	1.25033	–	2.28155	0.0365732	4.38815	0.0480736	8.05742	0.307415	-32.9283	24.6262	10.0536
	AH-15	2021-05-06	1.25333	–	2.52652	0.0747546	4.84064	0.136018	10.0088	0.266573	-26.3508	17.8366	8.91831
	AH-17	2021-05-26	1.16833	–	4.68553	0.0694118	8.95938	0.13031	27.2969	0.558452	-34.8986	19.2798	9.63991
	AH-19	2021-06-14	1.096	–	6.02749	0.0814997	11.5158	0.17397	39.711	0.575224	-36.1861	29.1889	13.0537
	AH-21	2021-07-13	0.923167	–	8.89787	0.0685819	17.0627	0.136481	60.443	0.619862	-74.6108	7.7341	3.15743
	Precipitation
		2021-01-28	–	73.8	-2.47282	0.0314506	-4.73048	0.0528502	-22.0683	0.256664	27.7359	15.9612	6.03277
		2021-02-23	–	61	-1.98747	0.0515396	-3.78105	0.0578475	-21.1531	1.2058	10.7356	22.8863	13.2134
		2021-03-18	–	14.8	-1.78494	0.0551055	-3.3981	0.0807536	-19.1162	0.6565	10.7151	23.2572	8.79039
		2021-04-20	–	28.2	-1.50729	0.0416853	-2.87234	0.0728782	-16.6357	0.726704	15.2676	12.3967	4.68549
		2021-05-16	–	39.8	-2.05992	0.0308861	-3.8734	0.0511222	-29.0354	0.212692	-12.9155	17.5995	6.652
		2021-05-26	–	1.6	-1.01013	0.0259982	-1.91794	0.0298982	-5.11517	0.852541	2.44576	15.3327	6.85699
		2021-06-14	–	39	-0.775724	0.0457045	-1.45655	0.070481	-5.836	0.192636	-6.40601	16.9229	6.39624
		2021-11-04	–	56.8	-2.4097	0.0386458	-4.56618	0.0557109	-27.9454	0.800631	3.86056	17.0408	7.62086
		2021-12-03	–	31.2	-3.78506	0.0166733	-7.18061	0.0253734	-47.3376	0.198998	12.7969	11.9082	4.50086
		2022-01-11	–	67.6	-3.21657	0.0355889	-6.12951	0.0490165	-44.4788	0.172968	24.5887	21.8398	8.25465
